# Supplementary material for: Type of tea consumption and depressive symptoms in Chinese older adults
Source: Springer Nature journal article supplement (doi:10.1186/s12877-021-02203-z), 2021-05-24
Supplement: MOESM1 [file 19191072]

## Type of tea consumption and depressive symptom in older women and men

Yao Yao, Huashuai Chen, Lele Chen, Sang-Yhun Ju, Huazhen Yang, Yi Zeng, Danan Gu, and Tze Pin NG

**Supplementary Table 1**..... Page 2  
Types and frequencies of consumption of teas in the study population.

**Supplementary Table 2**..... Page 3  
Subgroup analyses on levels and types of tea consumption and depressive symptoms

**Supplementary Figure 1**..... Page 5  
Map of tea production areas in China and distribution of participants of CLHLS by type of tea intake

**Supplementary Figure 2**..... Page 6  
Sensitivity analysis of type and frequency of tea intake with depressive symptoms by (a) using different cut-off value of CES-D-10=12 and (b) using different cut-off value of CES-D-10=8 as the definition of depressive symptoms.

**Supplementary Figure 3**..... Page 7  
Sensitivity analysis of type and frequency of tea intake with depressive symptoms by (a) removing participants with severe cognitive impairment (MMSE<19; n=1,432) and (b) removing participants who were bedridden or terminally ill (n=261).

**Supplementary Figure 4**..... Page 8  
Sensitivity analysis of type and frequency of tea intake with depressive symptoms by (a) using full sample after multiple imputation (n=13,825) and (b) by adjusting sampling weight based on age-sex-residence-specific distribution of 2015 mini-census of China.

## Supplementary Contents

**Supplementary Table 1**

Types and frequencies of consumption of teas in the study population.

| <b>Types of tea consumption</b>                   |                                  | <b>Detailed classifications</b>                                                                                                                                                                                                                                                                                                                                                                                                                                                                                                                                                                                                                                                                                                                      |                      |                   |
|---------------------------------------------------|----------------------------------|------------------------------------------------------------------------------------------------------------------------------------------------------------------------------------------------------------------------------------------------------------------------------------------------------------------------------------------------------------------------------------------------------------------------------------------------------------------------------------------------------------------------------------------------------------------------------------------------------------------------------------------------------------------------------------------------------------------------------------------------------|----------------------|-------------------|
| <b>Green tea</b>                                  |                                  | Bi Luo Chun, Lung Chen tea (Dragon Well tea), Anhua pine needles, Baohong tea, Xinyang Maojian, Emei bamboo leaf green, Liuan melon slices, Duyun Maojian, En Shi Yulou, Gaoqiao Yinfeng, Guzhu purple bamboo shoots, Guiping Xishan tea, Huangshan Maofeng, Huiming tea, Jietan tea, Trail Mountain tea, Jingtong green snow, Old Bamboo generous, Mount Lu Yunwu tea, Mei tea, Mengding tea, Nan'an Shiting green, Nanjing Rain Flower tea, Pingshui Zhu tea, Qinba Wuhao, Quan Ganghun Bai, Rizhu snow bud, Taiping Monkey Kui, Tianshan green bud, Tianzun Gong bud, Wuxi Hao tea, Wu Zi Xianhao, Wuyuan Minmei, Wuzhou Ju Yan, Xiuzhou Bi Feng, Cactus tea, Huoning Songluo, Chungxi fire green, Yunfeng and coiling Hao, Zi-Yang Maojian, etc. |                      |                   |
| <b>Fermented tea</b>                              | Low                              | White tea                                                                                                                                                                                                                                                                                                                                                                                                                                                                                                                                                                                                                                                                                                                                            |                      |                   |
|                                                   | ↓<br>degree of fermentation<br>↓ | Yellow tea                                                                                                                                                                                                                                                                                                                                                                                                                                                                                                                                                                                                                                                                                                                                           |                      |                   |
|                                                   |                                  | Oolong tea                                                                                                                                                                                                                                                                                                                                                                                                                                                                                                                                                                                                                                                                                                                                           |                      |                   |
|                                                   |                                  | Black tea                                                                                                                                                                                                                                                                                                                                                                                                                                                                                                                                                                                                                                                                                                                                            |                      |                   |
|                                                   |                                  | Compressed tea                                                                                                                                                                                                                                                                                                                                                                                                                                                                                                                                                                                                                                                                                                                                       |                      |                   |
|                                                   |                                  | High                                                                                                                                                                                                                                                                                                                                                                                                                                                                                                                                                                                                                                                                                                                                                 | Dark tea             |                   |
| <b>Flower tea</b>                                 |                                  | White orchid tea, May flower tea, Chamomile tea, Chrysanthemum tea, Lavender tea, Honeysuckle tea, Rose tea, Jasmine tea, etc.                                                                                                                                                                                                                                                                                                                                                                                                                                                                                                                                                                                                                       |                      |                   |
| <b>Frequency of tea consumption</b>               |                                  | <b>Green tea</b>                                                                                                                                                                                                                                                                                                                                                                                                                                                                                                                                                                                                                                                                                                                                     | <b>Fermented tea</b> | <b>Flower tea</b> |
| Never or rarely: < 1 cup/month or never drink tea |                                  | 9235                                                                                                                                                                                                                                                                                                                                                                                                                                                                                                                                                                                                                                                                                                                                                 | 9262                 | 9232              |
| Occasionally: < 1 cup/day but ≥ 1 cup/month       |                                  | 689                                                                                                                                                                                                                                                                                                                                                                                                                                                                                                                                                                                                                                                                                                                                                  | 670                  | 306               |
| Daily: ≥ 1 cup/day                                |                                  | 1266                                                                                                                                                                                                                                                                                                                                                                                                                                                                                                                                                                                                                                                                                                                                                 | 444                  | 452               |

## Supplementary Contents

### Supplementary Table 2

Subgroup analyses on levels and types of tea consumption and depressive symptoms

|                                    | Green tea       |                  |                  | Fermented tea   |                  |                  | Flower tea      |                  |                  |
|------------------------------------|-----------------|------------------|------------------|-----------------|------------------|------------------|-----------------|------------------|------------------|
|                                    | Never or rarely | Occasionally     | Daily            | Never or rarely | Occasionally     | Daily            | Never or rarely | Occasionally     | Daily            |
| Whole sample                       | 9235            | 689              | 1266             | 9262            | 670              | 444              | 9232            | 306              | 452              |
| OR (95% CI) <sup>1</sup>           |                 |                  |                  |                 |                  |                  |                 |                  |                  |
| Model 1                            | 1.00            | 0.70 (0.60-0.81) | 0.44 (0.39-0.50) | 1.00            | 0.73 (0.64-0.85) | 0.47 (0.39-0.57) | 1.00            | 0.74 (0.62-0.89) | 0.34 (0.28-0.41) |
| Model 2                            | 1.00            | 0.89 (0.76-1.03) | 0.64 (0.56-0.72) | 1.00            | 0.84 (0.73-0.98) | 0.67 (0.56-0.82) | 1.00            | 0.87 (0.70-1.08) | 0.45 (0.36-0.55) |
| Model 3                            | 1.00            | 0.95 (0.82-1.10) | 0.70 (0.61-0.79) | 1.00            | 0.88 (0.76-1.03) | 0.75 (0.61-0.91) | 1.00            | 0.94 (0.75-1.15) | 0.49 (0.40-0.61) |
| Model 4                            | 1.00            | 0.97 (0.80-1.15) | 0.73 (0.66-0.87) | 1.00            | 0.90 (0.76-1.04) | 0.84 (0.75-0.96) | 1.00            | 0.96 (0.76-1.20) | 0.53 (0.43-0.68) |
| Subgroup Analyses based on Model 4 |                 |                  |                  |                 |                  |                  |                 |                  |                  |
| Males                              |                 |                  |                  |                 |                  |                  |                 |                  |                  |
| OR (95% CI)                        | 1.00            | 0.99 (0.79-1.24) | 0.71 (0.59-0.84) | 1.00            | 0.86 (0.66-1.13) | 0.84 (0.65-1.07) | 1.00            | 1.25 (0.91-1.74) | 0.54 (0.40-0.72) |
| Females                            |                 |                  |                  |                 |                  |                  |                 |                  |                  |
| OR (95% CI)                        | 1.00            | 1.01 (0.79-1.28) | 0.86 (0.69-1.07) | 1.00            | 0.90 (0.73-1.12) | 0.85 (0.70-1.00) | 1.00            | 0.71 (0.51-0.97) | 0.50 (0.35-0.72) |
| Age < 80 years                     |                 |                  |                  |                 |                  |                  |                 |                  |                  |
| OR (95% CI)                        | 1.00            | 1.04 (0.80-1.35) | 0.82 (0.67-1.01) | 1.00            | 0.86 (0.63-1.18) | 0.74 (0.56-0.97) | 1.00            | 0.97 (0.66-1.42) | 0.60 (0.42-0.86) |
| Age ≥ 80 years                     |                 |                  |                  |                 |                  |                  |                 |                  |                  |
| OR (95% CI)                        | 1.00            | 0.98 (0.80-1.21) | 0.72 (0.60-0.86) | 1.00            | 0.97 (0.79-1.19) | 0.85 (0.63-1.11) | 1.00            | 0.94 (0.70-1.26) | 0.47 (0.35-0.64) |
| Urban residency                    |                 |                  |                  |                 |                  |                  |                 |                  |                  |
| OR (95% CI)                        | 1.00            | 0.96 (0.78-1.18) | 0.73 (0.62-0.87) | 1.00            | 0.97 (0.79-1.19) | 0.78 (0.59-1.03) | 1.00            | 1.07 (0.79-1.45) | 0.52 (0.39-0.68) |
| Rural residency                    |                 |                  |                  |                 |                  |                  |                 |                  |                  |
| OR (95% CI)                        | 1.00            | 1.09 (0.84-1.43) | 0.81 (0.66-1.01) | 1.00            | 0.76 (0.59-1.00) | 0.97 (0.71-1.35) | 1.00            | 0.82 (0.57-1.17) | 0.54 (0.37-0.80) |
| Northern China                     |                 |                  |                  |                 |                  |                  |                 |                  |                  |
| OR (95% CI)                        | 1.00            | 1.05 (0.76-1.46) | 0.75 (0.56-1.01) | 1.00            | 1.35 (0.89-1.72) | 0.61 (0.37-1.00) | 1.00            | 1.02 (0.71-1.47) | 0.56 (0.40-0.79) |
| Eastern China                      |                 |                  |                  |                 |                  |                  |                 |                  |                  |
| OR (95% CI)                        | 1.00            | 1.25 (0.91-1.62) | 0.85 (0.67-1.07) | 1.00            | 0.91 (0.64-1.29) | 1.40 (0.95-1.86) | 1.00            | 0.65 (0.31-1.55) | 0.43 (0.18-1.05) |
| Central China                      |                 |                  |                  |                 |                  |                  |                 |                  |                  |

## Supplementary Contents

|                    |      |                  |                  |      |                  |                  |      |                  |                  |
|--------------------|------|------------------|------------------|------|------------------|------------------|------|------------------|------------------|
| OR (95% CI)        | 1.00 | 0.88 (0.62-1.25) | 0.85 (0.65-1.11) | 1.00 | 0.74 (0.50-1.08) | 0.83 (0.43-1.60) | 1.00 | 0.72 (0.30-1.68) | 0.63 (0.29-1.38) |
| Southwestern China |      |                  |                  |      |                  |                  |      |                  |                  |
| OR (95% CI)        | 1.00 | 0.81 (0.57-1.15) | 0.48 (0.35-0.65) | 1.00 | 0.71 (0.54-0.93) | 0.68(0.48-1.98)  | 1.00 | 1.08 (0.83-1.37) | 0.63 (0.44-0.91) |

<sup>1</sup>OR, odds ratio; 95% CI, 95% confidential interval. Model 1 included types of tea consumption as the sole variable; Model 2 controlling for demographic and socioeconomic variables: age (continuous), gender, education, socioeconomic status, rural residence and geographical regions; Model 3 additionally controlling for psychosocial and behavioral variables: marital status, living arrangement, social and leisure activity index, smoking, alcohol drinking, BMI, regular dietary (vegetable/fruit/fish/nut) intake; Model 4 additionally for health variables: self-rated health, cognitive impairment, and medical illness, comorbidity, and ADL disability.

## Supplementary Contents

### Supplementary Figure 1

Map of tea production areas in China and distribution of participants of CLHLS by type of tea intake.

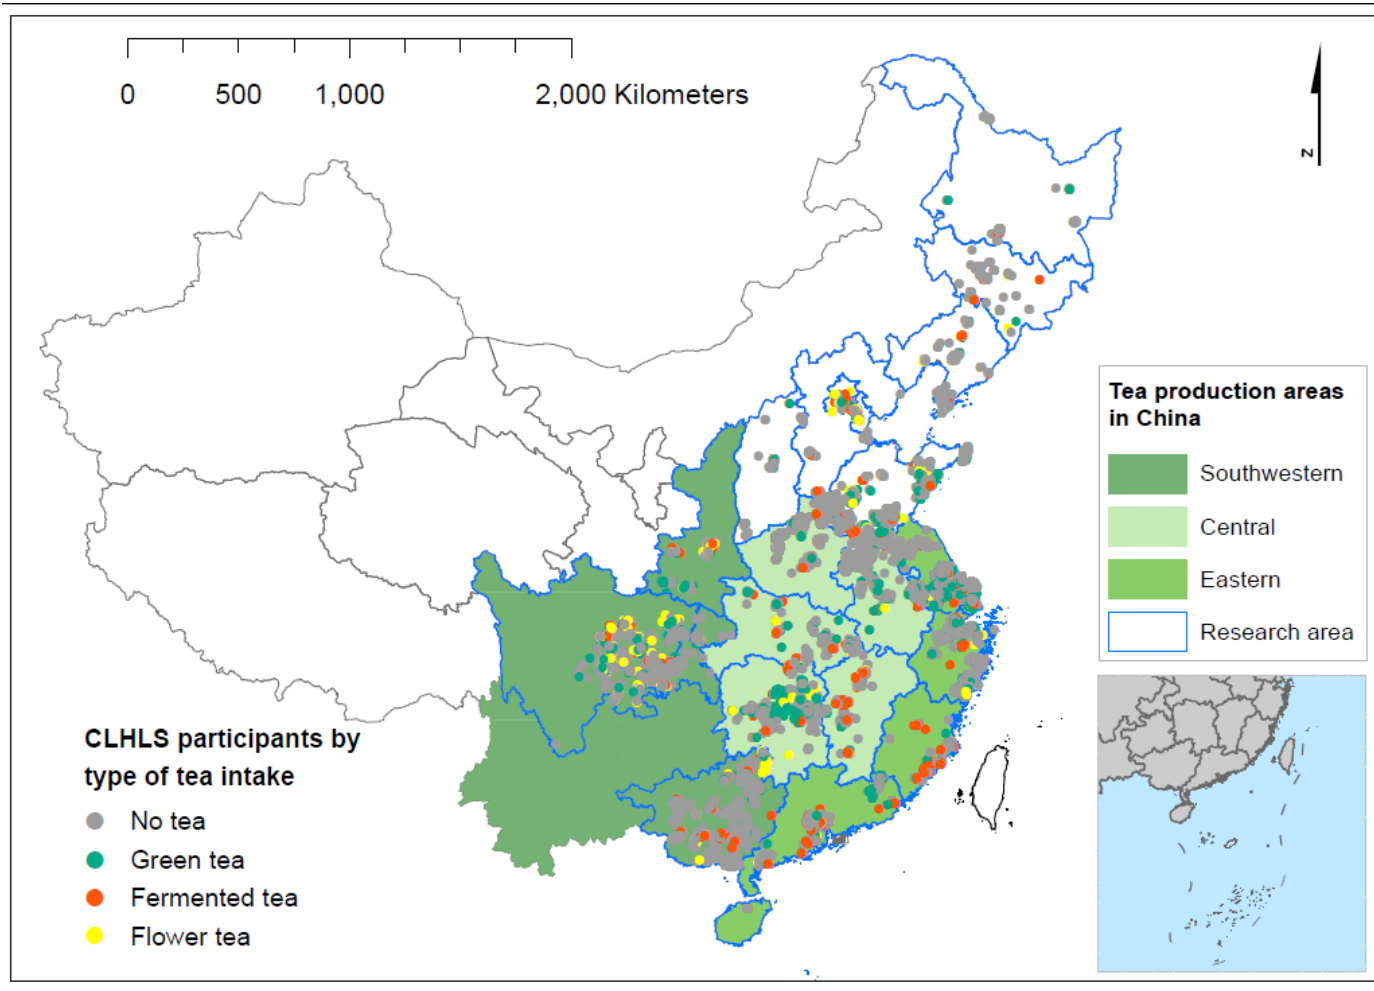

Note: Tea consumption was classified into No tea, Green tea, Fermented tea, and Flower tea, according to the self-reported habits of tea intake; the distribution of tea consumption was depicted according to the participants' resident location. The participants are from 23 provinces of China and they are shown in area of the blue frame. According to the Economic Regionalization Scheme of the National Bureau of Statistics of China, tea production regions were classified into Southwestern, Central, and Eastern areas. The map was made by the authors.

Supplementary Contents

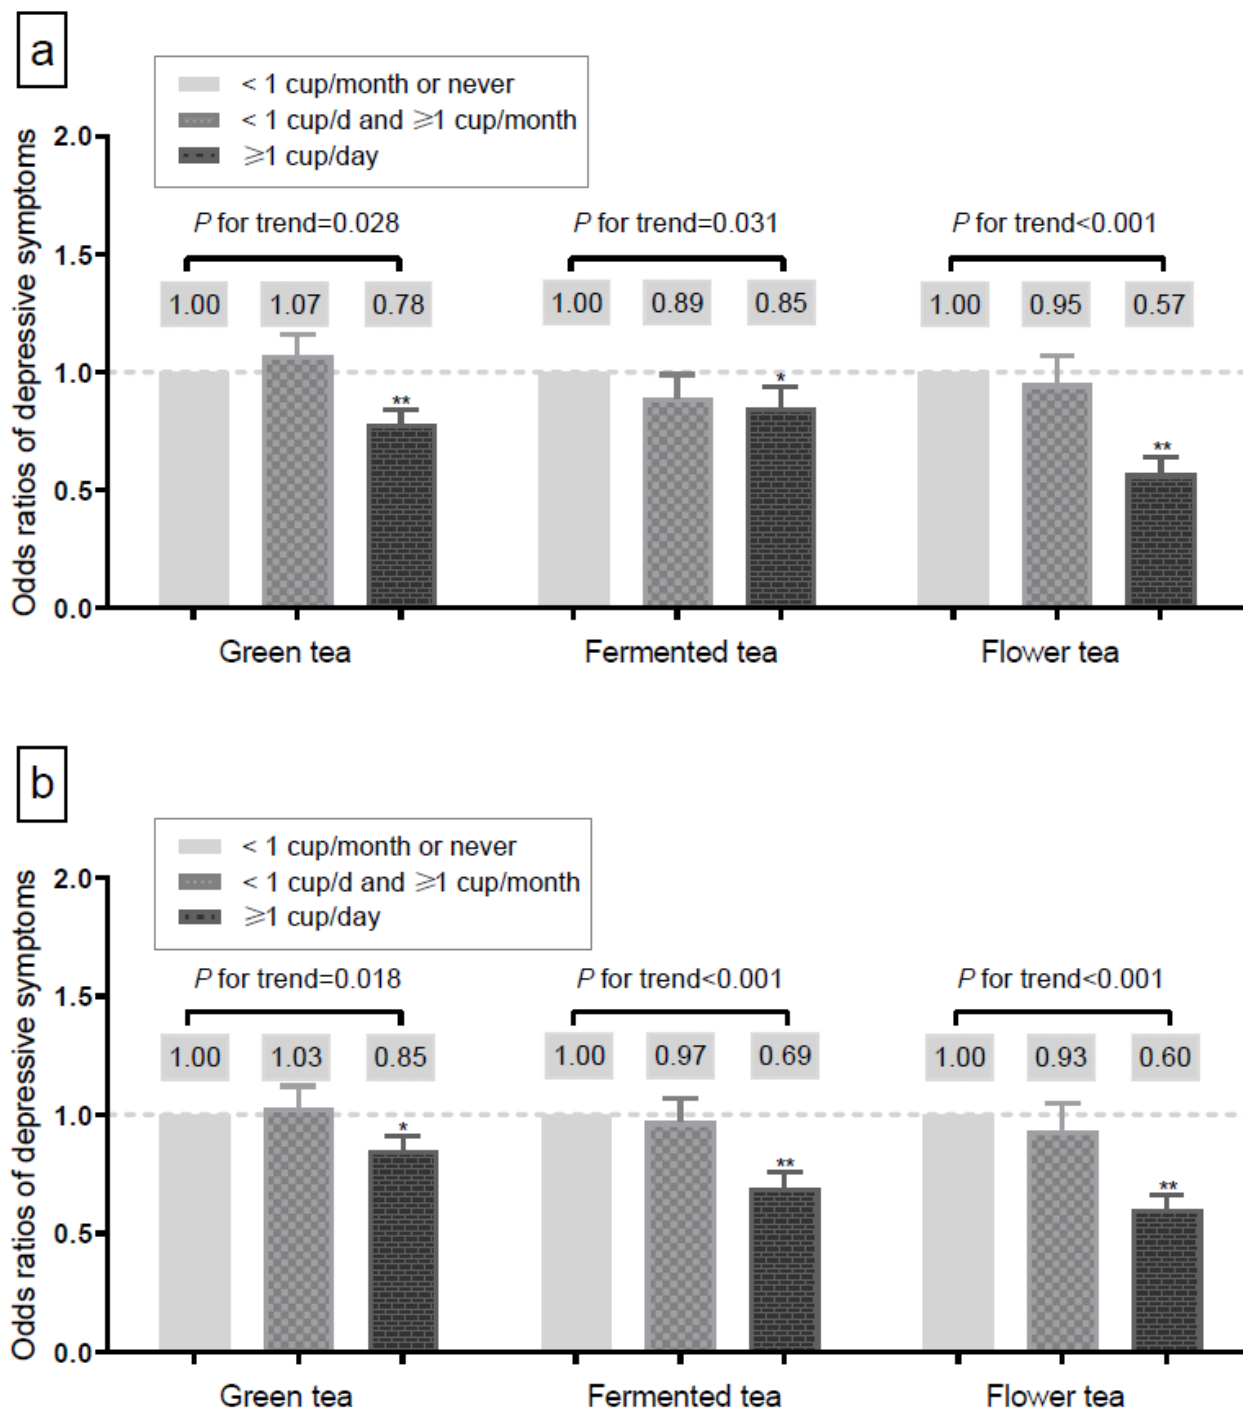

**Supplementary Figure 2**

Sensitivity analysis of type and frequency of tea intake with depressive symptoms by (a) using different cut-off value of CES-D-10=12 and (b) using different cut-off value of CES-D-10=8 as the definition of depressive symptoms. Main model included types of tea consumption as the sole variable and controlling for demographic and socioeconomic variables (age, gender, education, socioeconomic status, rural residence and geographical regions), psychosocial and behavioral variables (marital status, living arrangement, social and leisure activity index, smoking, alcohol drinking, BMI, regular dietary [vegetable/fruit/fish/nut] intake), and health variables (self-rated health, cognitive impairment, and medical illness, comorbidity, and ADL disability).

\*  $P < 0.05$

\*\*  $P < 0.01$

## Supplementary Contents

### Supplementary Figure 3

Sensitivity analysis of type and frequency of tea intake with depressive symptoms by (a) removing participants with severe cognitive impairment (MMSE<19; n=1,432) and (b) removing participants who were bedridden or terminally ill (n=261). Main model included types of tea consumption as the sole variable and controlling for demographic and socioeconomic variables (age, gender, education, socioeconomic status, rural residence and geographical regions), psychosocial and behavioral variables (marital status, living arrangement, social and leisure activity index, smoking, alcohol drinking, BMI, regular dietary [vegetable/fruit/fish/nut] intake), and health variables (self-rated health, cognitive impairment, and medical illness, comorbidity, and ADL disability).

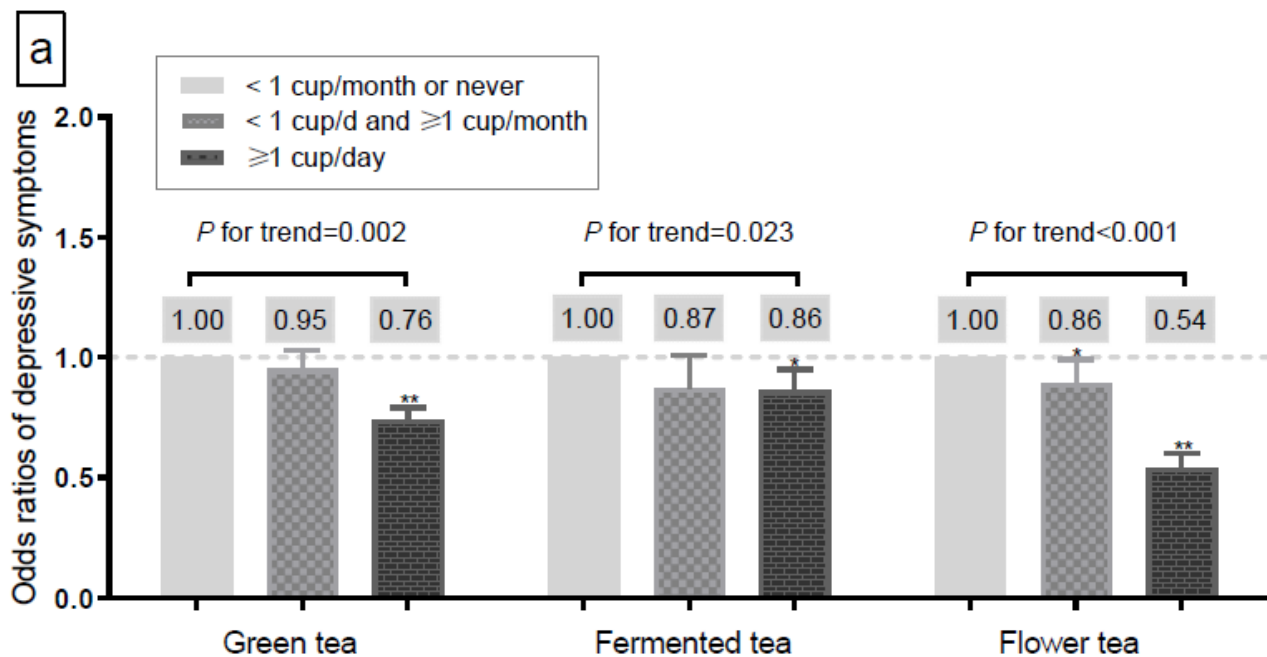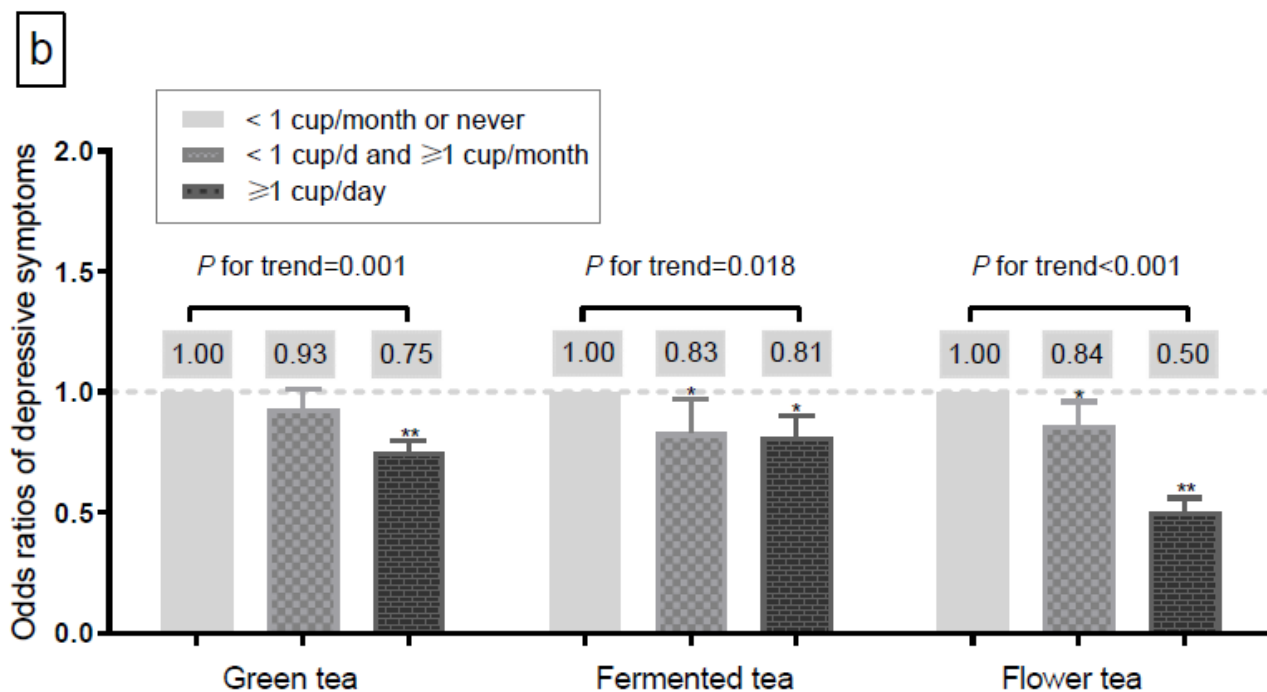

Note: \* P<0.05; \*\* P<0.01

## Supplementary Contents

### Supplementary Figure 4

Sensitivity analysis of type and frequency of tea intake with depressive symptoms by (a) using full sample after multiple imputation (n=13,825) and (b) by adjusting sampling weight based on age-sex-residence-specific distribution of 2015 mini-census of China. Main model included types of tea consumption as the sole variable and controlling for demographic and socioeconomic variables (age, gender, education, socioeconomic status, rural residence and geographical regions), psychosocial and behavioral variables (marital status, living arrangement, social and leisure activity index, smoking, alcohol drinking, BMI, regular dietary [vegetable/fruit/fish/nut] intake), and health variables (self-rated health, cognitive impairment, and medical illness, comorbidity, and ADL disability).

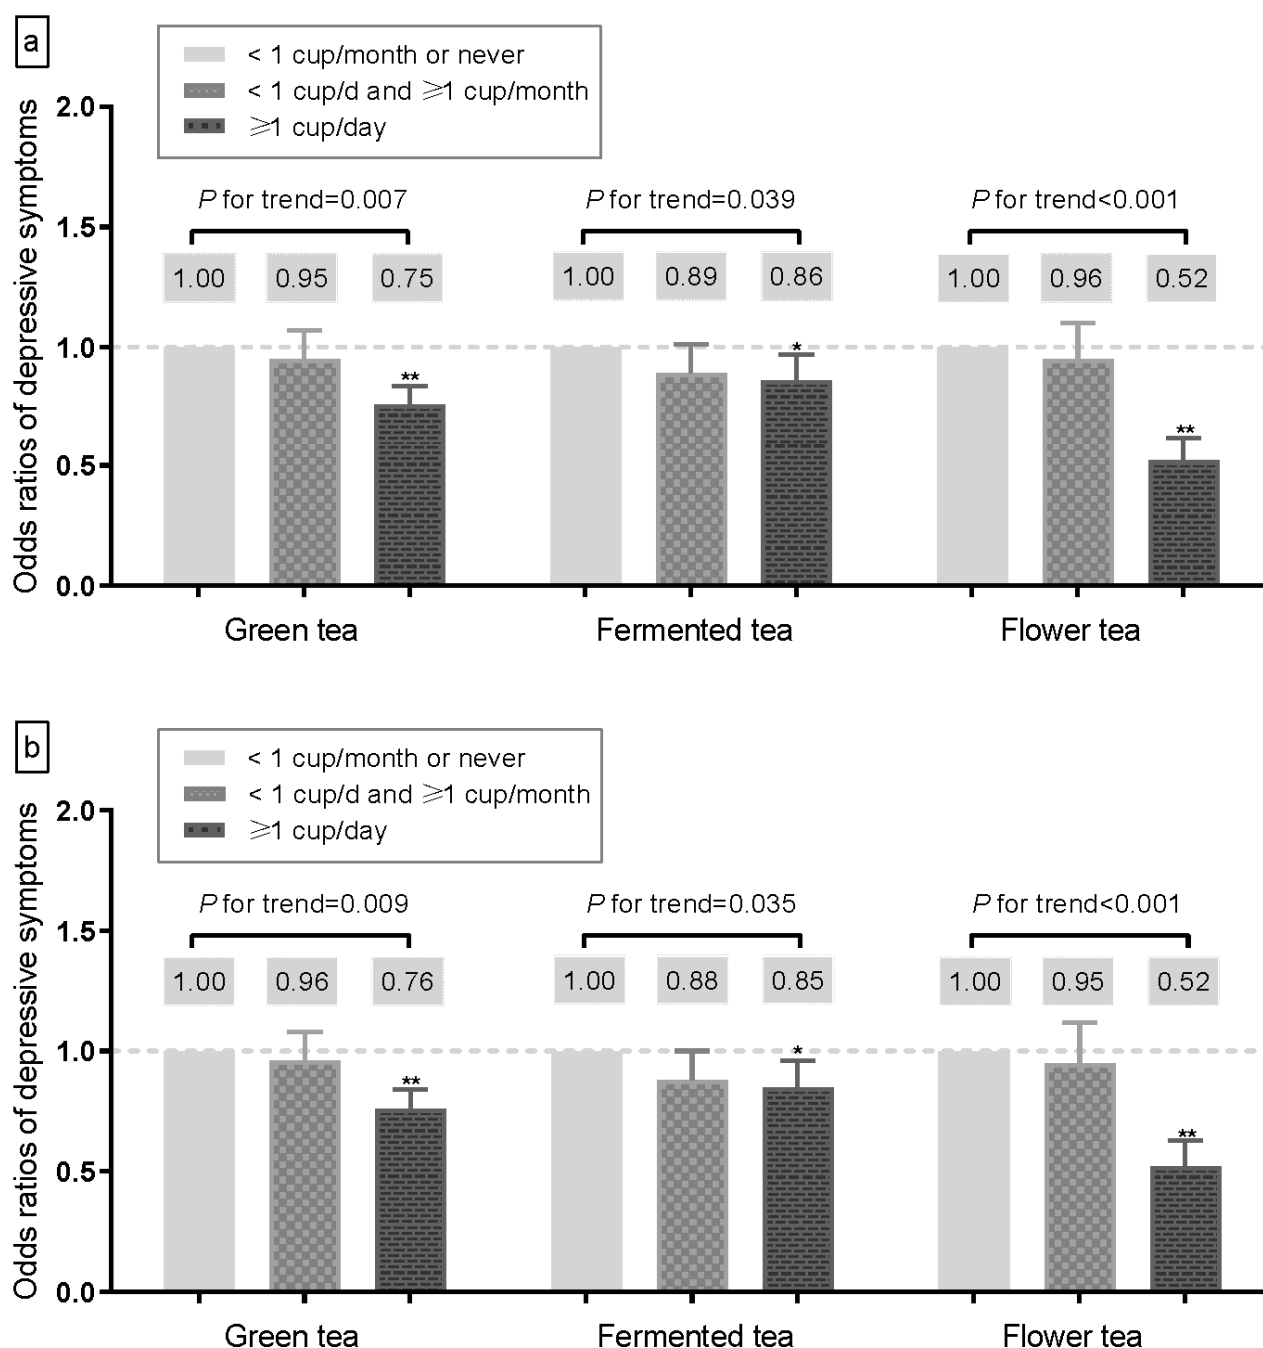

Note: \* P<0.05 \*\* P<0.01
